# Supplementary material for: Inhibition of DNA Repair Pathways and Induction of ROS Are Potential Mechanisms of Action of the Small Molecule Inhibitor BOLD-100 in Breast Cancer
Source: PubMed Central journal article supplement (PMC7563761; doi:10.3390/cancers12092647), 2020-09-16
Supplement: cancers-12-02647-s001.pdf [file cancers-12-02647-s001.pdf]

## Supplementary Materials

**Table S1: Top 6 identified disease and functional pathways enriched in differentially expressed (DE) genes in MCF7(2) cells.** Significantly changed genes following treatment with 100  $\mu$ M BOLD-100 were ranked by p-value (IPA Core Analysis, QIAGEN).

| # DE GENES | TOP DISEASE AND FUNCTIONS                                                     |
|------------|-------------------------------------------------------------------------------|
| 33         | RNA Post-Translational Modification, Cancer, Cell-mediated Immune Response    |
| 32         | Gene Expression, Connective Tissue Disorders, Developmental Disorders         |
| 31         | Drug Metabolism, Endocrine System Development and Function, Lipid Metabolism  |
| 31         | Cancer, Cell Cycle, Cellular Assembly and Organization                        |
| 31         | Embryonic Development, Cell Cycle, Cellular Development                       |
| 29         | Lipid Metabolism, Small Molecule Biochemistry, Vitamin and Mineral Metabolism |

**Table S2.** Complete list of Reserve Phase Protein Array (RPPA) results with significantly altered proteins in MCF7 cells treated with 100  $\mu$ M BOLD-100 compared with control.

| PROTEIN NAME               | p-value | % Difference in 100 $\mu$ M BOLD-100 treated cells |
|----------------------------|---------|----------------------------------------------------|
| Rab11                      | <0.001  | 19% increased                                      |
| PDK1                       | <0.001  | 24% increased                                      |
| Notch3                     | <0.001  | 16% increased                                      |
| TSC1                       | <0.001  | 27% increased                                      |
| 14-3-3-beta                | <0.001  | 12% increased                                      |
| p38-MAPK                   | <0.001  | 16% increased                                      |
| SOD2                       | <0.001  | 22% increased                                      |
| G6PD                       | <0.001  | 39% increased                                      |
| NAPSIN                     | <0.001  | 11% decreased                                      |
| PI3K-p85                   | 0.001   | 6% increased                                       |
| HER2                       | 0.002   | 31% increased                                      |
| ACC1                       | 0.002   | 13% increased                                      |
| PEA-15                     | 0.002   | 12% increased                                      |
| PCNA                       | 0.002   | 8% decreased                                       |
| Raptor                     | 0.002   | 5% decreased                                       |
| RSK                        | 0.002   | 11% increased                                      |
| DM-K9-Histone-H3           | 0.003   | 6% decreased                                       |
| Rad51                      | 0.003   | 10% decreased                                      |
| HSP70                      | 0.004   | 18% increased                                      |
| PDK1_pS241                 | 0.004   | 35% increased                                      |
| Rock-1                     | 0.004   | 18% increased                                      |
| CD44                       | 0.004   | 7% decreased                                       |
| Jak2                       | 0.004   | 15% decreased                                      |
| ATM                        | 0.005   | 18% decreased                                      |
| Oct-4                      | 0.005   | 6% decreased                                       |
| b-Catenin                  | 0.005   | 7% decreased                                       |
| P-Cadherin                 | 0.005   | 12% increased                                      |
| Transglutaminase           | 0.005   | 5% increased                                       |
| D-a-Tubulin                | 0.005   | 8% increased                                       |
| Notch1                     | 0.006   | 21% increased                                      |
| TFAM                       | 0.006   | 30% increased                                      |
| INPP4b                     | 0.007   | 19% increased                                      |
| Chk2                       | 0.007   | 8% decreased                                       |
| Chk1_pS296                 | 0.007   | 4% decreased                                       |
| 14-3-3-zeta                | 0.009   | 17% increased                                      |
| PR (Progesterone receptor) | 0.009   | 64% decreased                                      |

|                 |       |               |
|-----------------|-------|---------------|
| DJ1             | 0.010 | 24% increased |
| $\beta$ -Actin  | 0.010 | 13% increased |
| Annexin-VII     | 0.010 | 16% increased |
| p27_pT198       | 0.011 | 14% decreased |
| MAPK_pT202_Y204 | 0.013 | 7% decreased  |
| p70-S6K1        | 0.013 | 15% increased |
| ATR_pS428       | 0.014 | 12% decreased |
| TIGAR           | 0.014 | 15% increased |
| MUC1 (EMA)      | 0.014 | 65% increased |
| UGT1A           | 0.015 | 36% increased |
| RBM15           | 0.015 | 19% decreased |
| FRA-1           | 0.016 | 7% increased  |
| TUFM            | 0.017 | 16% decreased |
| Bax             | 0.017 | 12% increased |
| Smad4           | 0.019 | 4% decreased  |
| HER2_pY1248     | 0.020 | 6% increased  |
| MEK1            | 0.020 | 7% increased  |
| Stat3           | 0.021 | 9% increased  |
| PKCa            | 0.021 | 4% increased  |
| MSI2            | 0.022 | 10% decreased |
| RPA32           | 0.022 | 5% decreased  |
| p53             | 0.022 | 7% increased  |
| AMPK-a2_pS345   | 0.023 | 12% decreased |
| Collagen-VI     | 0.025 | 21% increased |
| c-Jun_pS73      | 0.026 | 20% decreased |
| Smad3           | 0.026 | 8% decreased  |
| ATM_pS1981      | 0.027 | 3% decreased  |
| TAZ             | 0.030 | 13% increased |
| HER3            | 0.031 | 9% increased  |
| ATRX            | 0.031 | 24% decreased |
| Cyclin-E1       | 0.031 | 18% increased |
| Mcl-1           | 0.031 | 15% increased |
| TWIST           | 0.032 | 6% decreased  |
| Elk1_pS383      | 0.032 | 4% decreased  |
| LC3A-B          | 0.035 | 21% increased |
| IR-b (INSRB)    | 0.038 | 9% increased  |
| Rb              | 0.038 | 4% decreased  |
| PKC-b-II_pS660  | 0.039 | 10% increased |
| WIP1            | 0.042 | 4% decreased  |
| Ets-1           | 0.042 | 7% decreased  |
| Stathmin-1      | 0.042 | 3% decreased  |
| Paxillin        | 0.043 | 11% increased |
| IRS1            | 0.043 | 16% decreased |
| Cyclin-D3       | 0.044 | 39% increased |
| ERCC5           | 0.045 | 5% increased  |
| p27-Kip-1       | 0.048 | 2% decreased  |

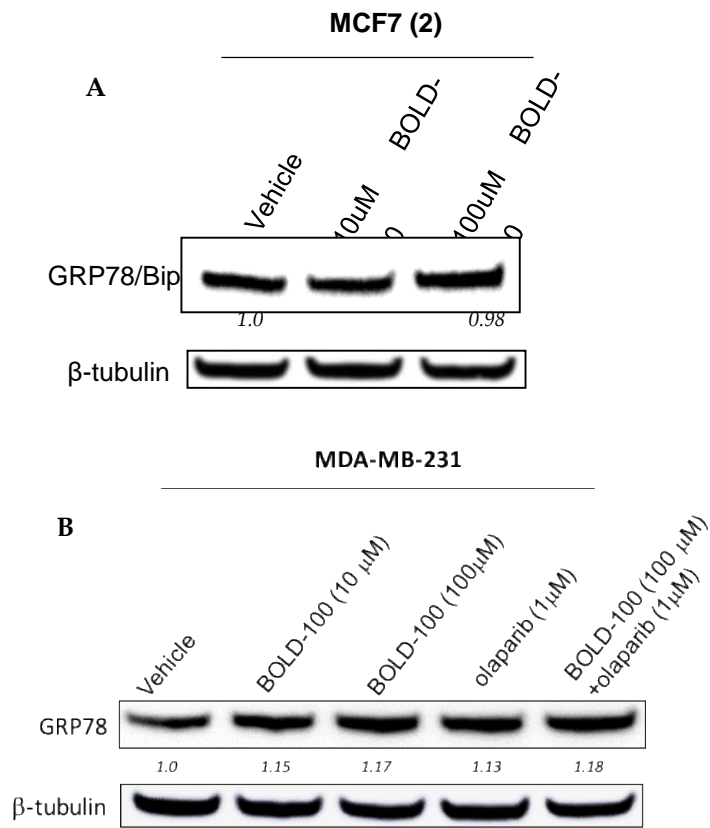

**Figure S1. GRP78 protein levels did not change in basal unstressed breast cancer cells cells.** (A) Western blot analysis of MCF7(2) cells that were treated with BOLD-100 at indicated doses for 72 h did not show any change in GRP78 levels compared to vehicle. Densitometry ratios (protein: loading control) of bands for all conditions versus vehicle control are shown. (B) GRP78 protein levels were determined in MDA-MB-231 cells by Western blotting. Cells were treated with indicated doses of BOLD-100 and/or olaparib for 72 h.  $\beta$ -tubulin was used as the loading control in both cases. For whole blots, please see Figures S7 and S8..

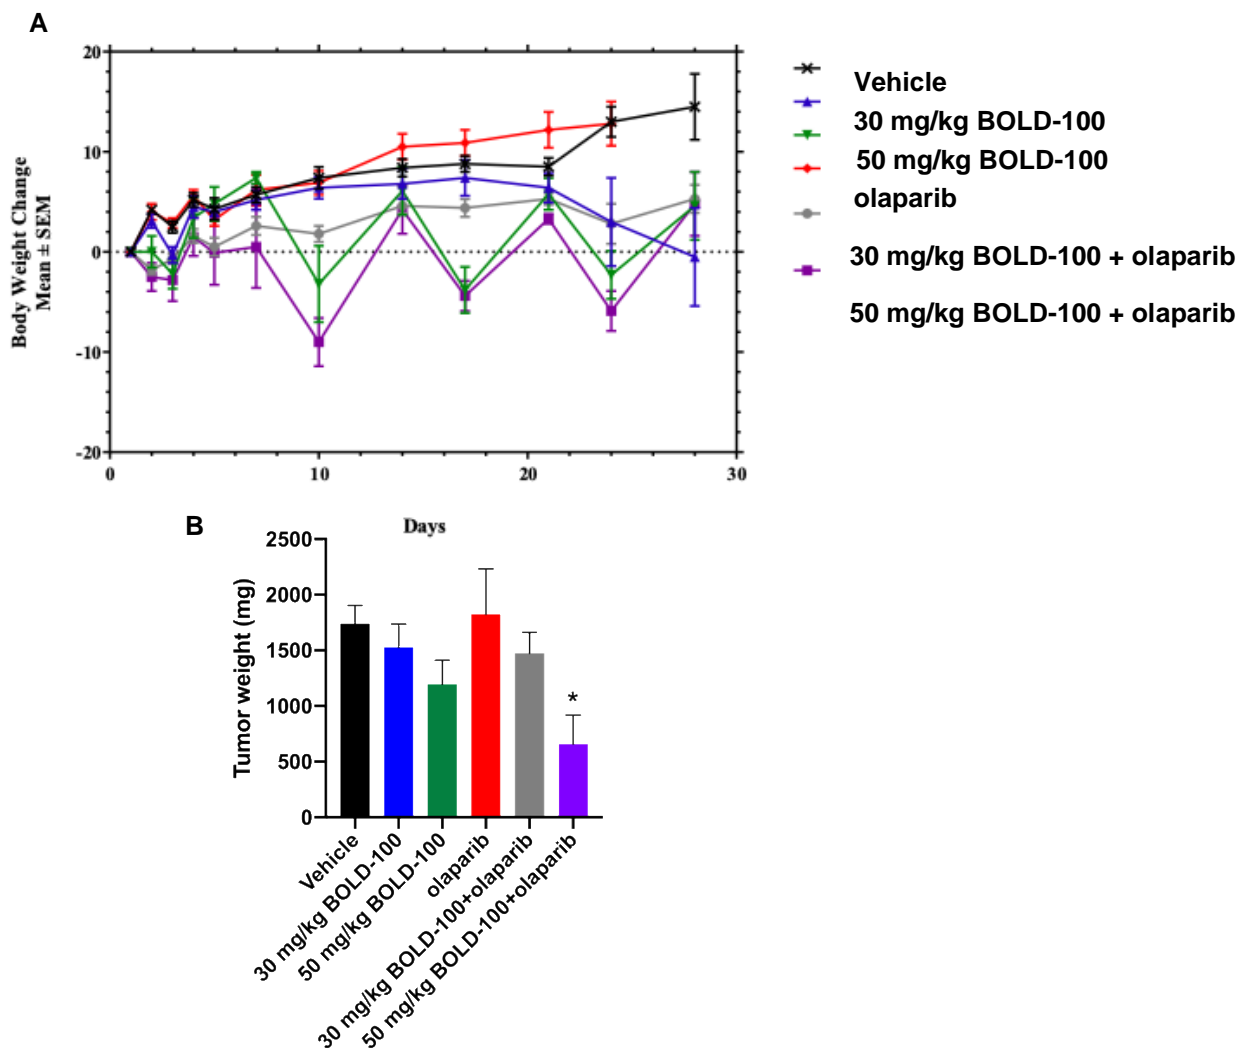

**Figure S2. Mean body weight of mice for in vivo MDA-MB-231 xenograft study.** (A) Mean body weights were calculated from Day 1 for each group for each day of body weight measurement, and were plotted as a function of time. Error bars on the plots indicate one standard error of the mean (SEM). (B) Tumor weights from each treatment group (n=4) show significantly ( $*p < 0.01$ ) decreased tumor weight in mice treated with BOLD-100 (50 mg/kg) + olaparib compared with that in vehicle treated mice (ANOVA,  $p < 0.05$ ).

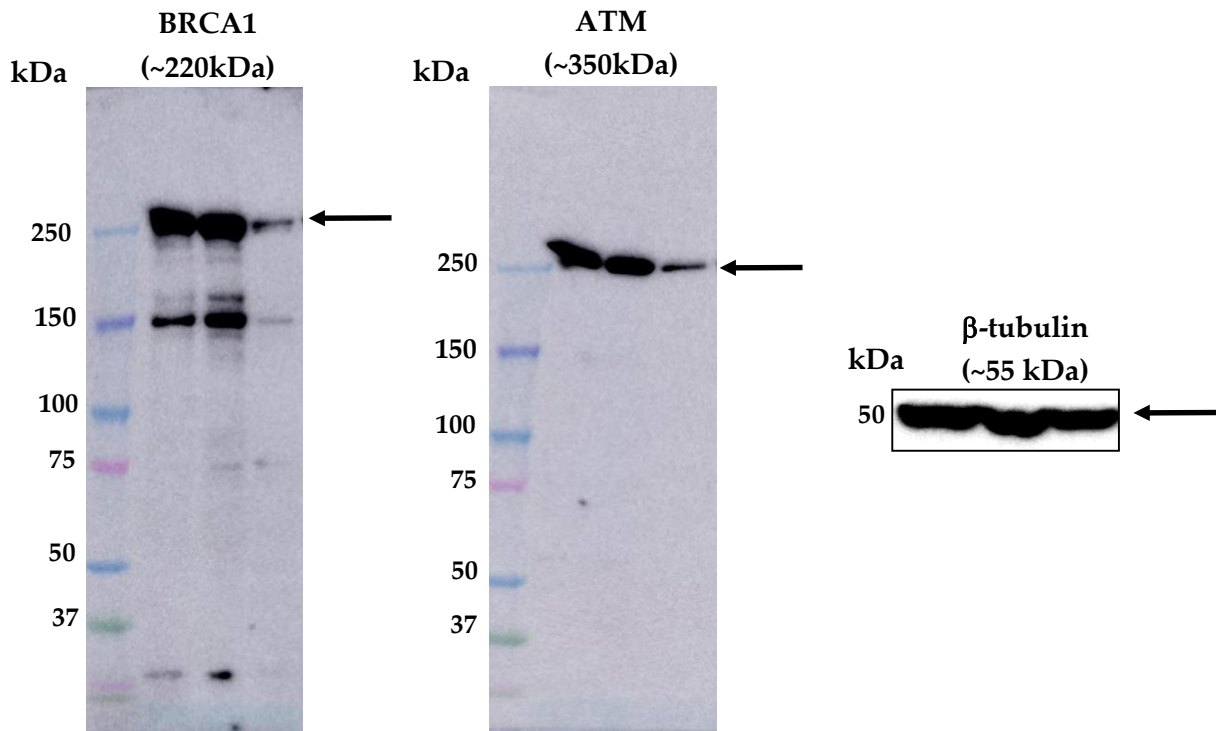

**Figure S3. Whole blot for Figure 3B.** Note: BRCA1 and ATM we reanalyzed with Tris-acetate gels to accommodate the large size of these proteins. All other gels were Tris-glycine (see Section 4.5). Membranes were stripped and reblotted with different antibodies. For  $\beta$ -tubulin, only cropped image is available since this antibody reliably shows one band and the image of the whole blot was not saved. .

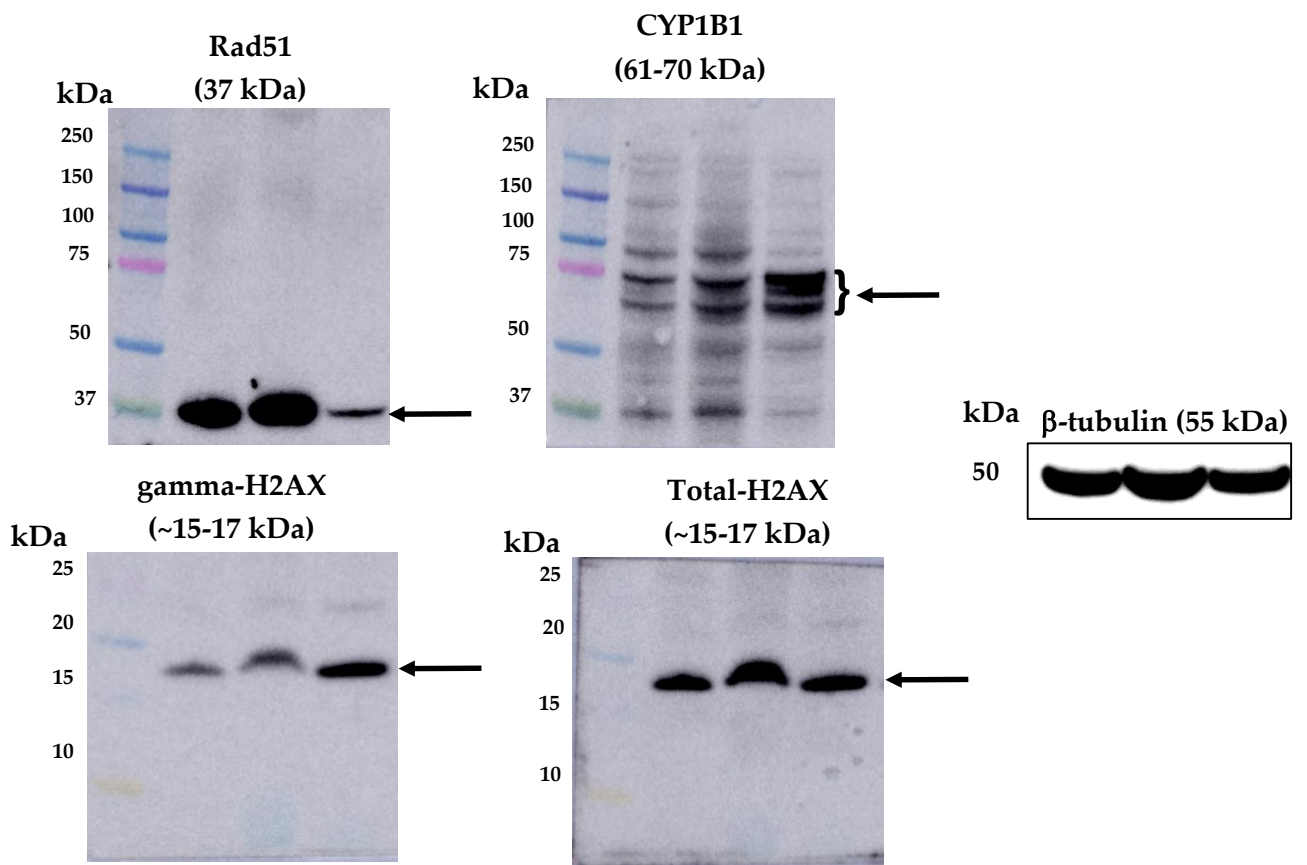

**Figure S4. Whole blot for Figure 3 C.** Note: This blot was cut and top portion was used to detect RAD51 and then stripped to detect CYP1B1. Bottom portion of blot was used to detect gamma-H2AX and then it was stripped and reused to detect total H2AX. For  $\beta$ -tubulin, which consistently produces one band, only image of the 55 kDa band was saved.

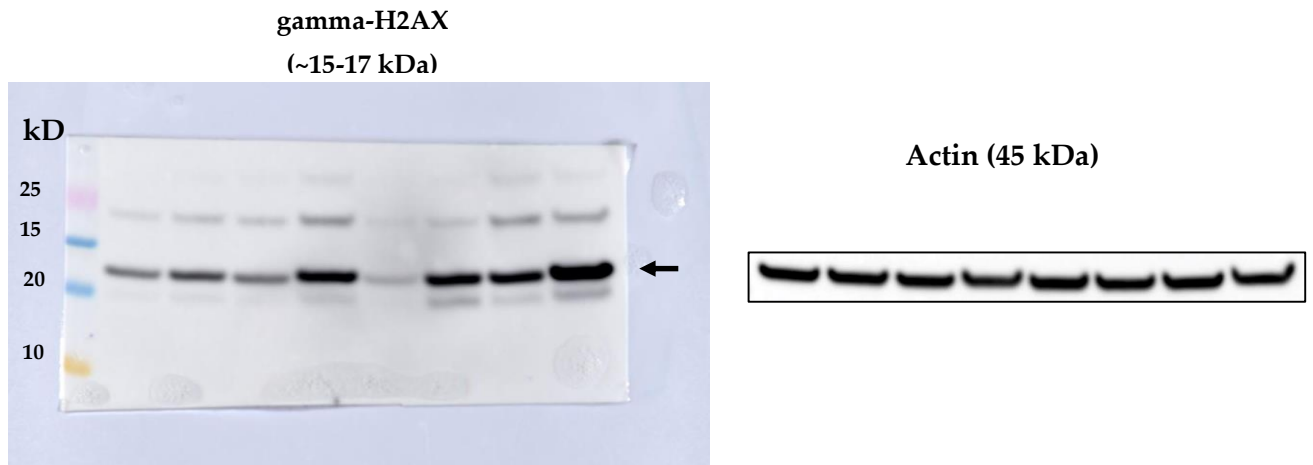

**Figure S5. Whole blot for Figure 6 A.** Note: This blot was cut and bottom portion was used for gamma-H2AX. For actin, which consistently produces one band, only the 45 kDa band was saved.

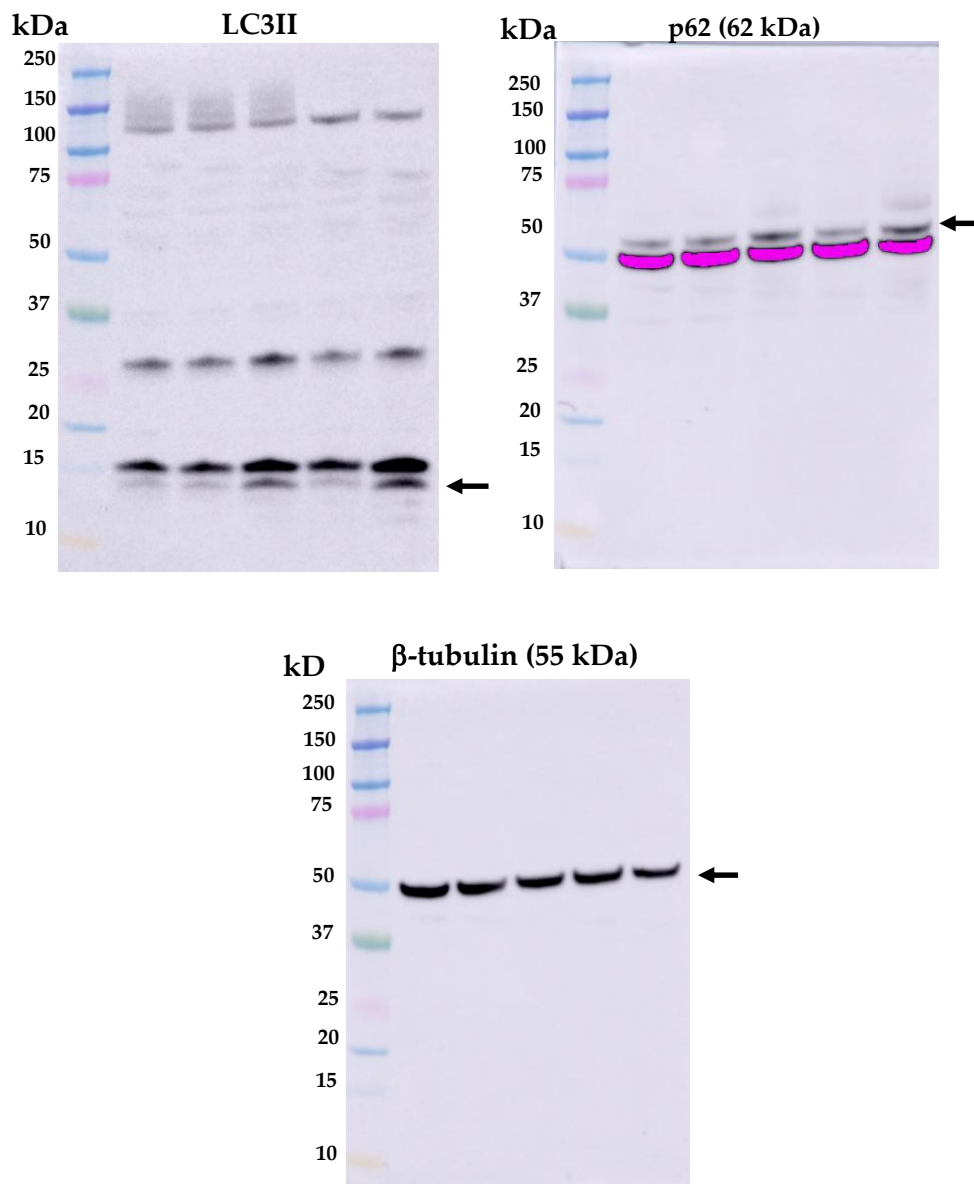

**Figure S6. Whole blot for Figure 6 B.** Note: This blot used for LC3II and then stripped and blotted for  $\beta$ -tubulin followed by p62.

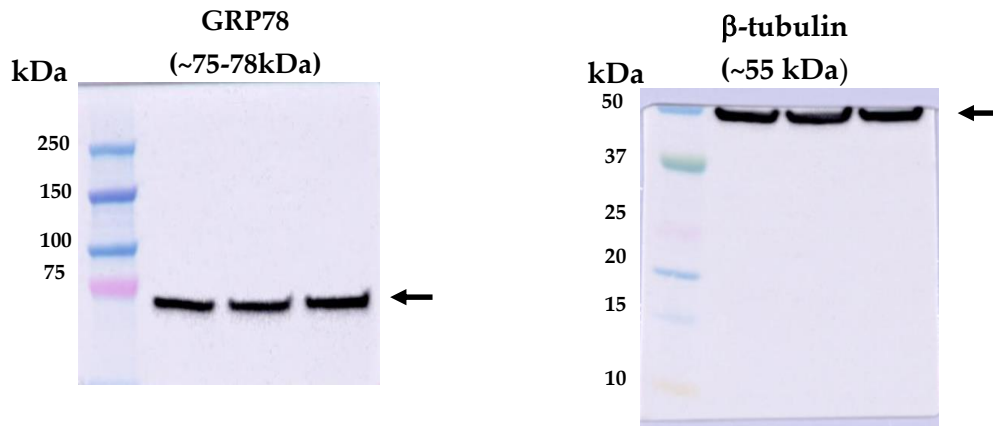

**Figure S7. Whole blot for Supplementary Figure S1.** Note: This blot was cut and top portion was used for GRP78 and bottom portion was used for  $\beta$ -tubulin.

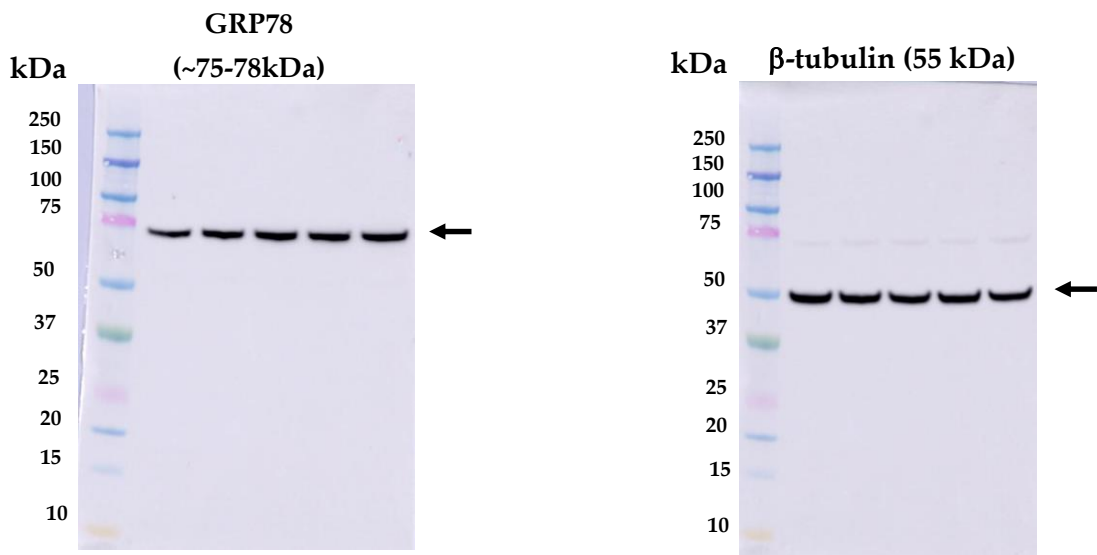

**Figure S8. Whole blot for Supplementary Figure S1 B.** Note: This blot was first used to detect GRP78, stripped and then used for  $\beta$ -tubulin.
